# Supplementary material
Source: publisher site journal article supplement (https://www.dovepress.com/article/316211)
Supplement: Supplementary file 1 [file get_supplementary_file.php]

**A**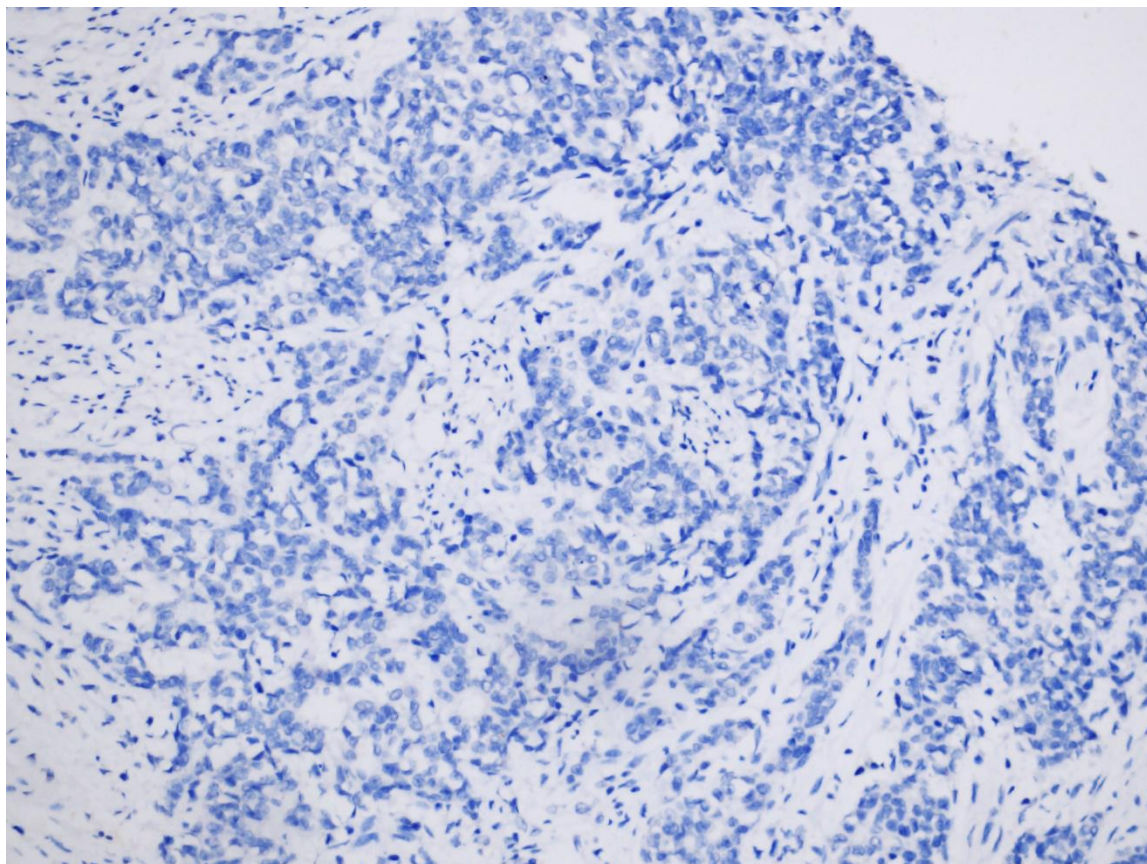**B**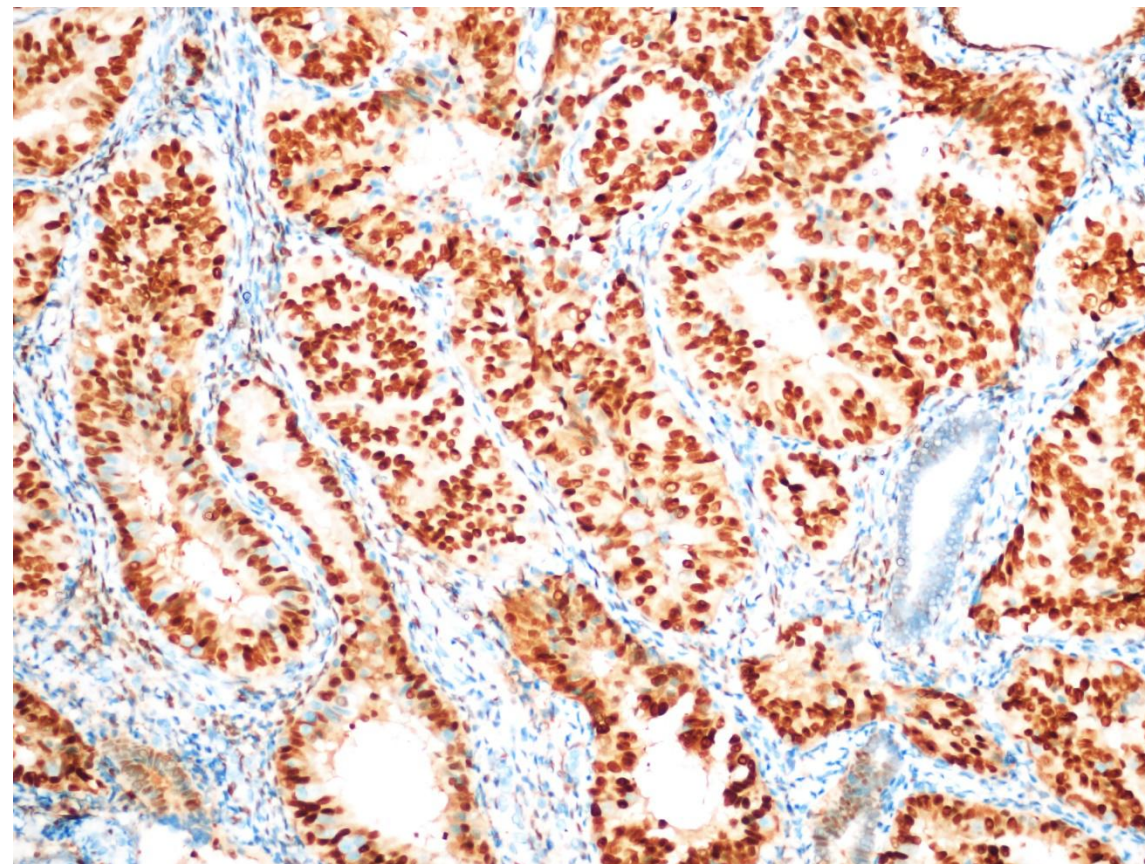

Supplementary Fig.1 Immunohistochemistry (IHC) of ER

Notes: (A) Negative expression of ER; (B) Positive expression of ER. Scale bar: 100  $\mu$ m



**A**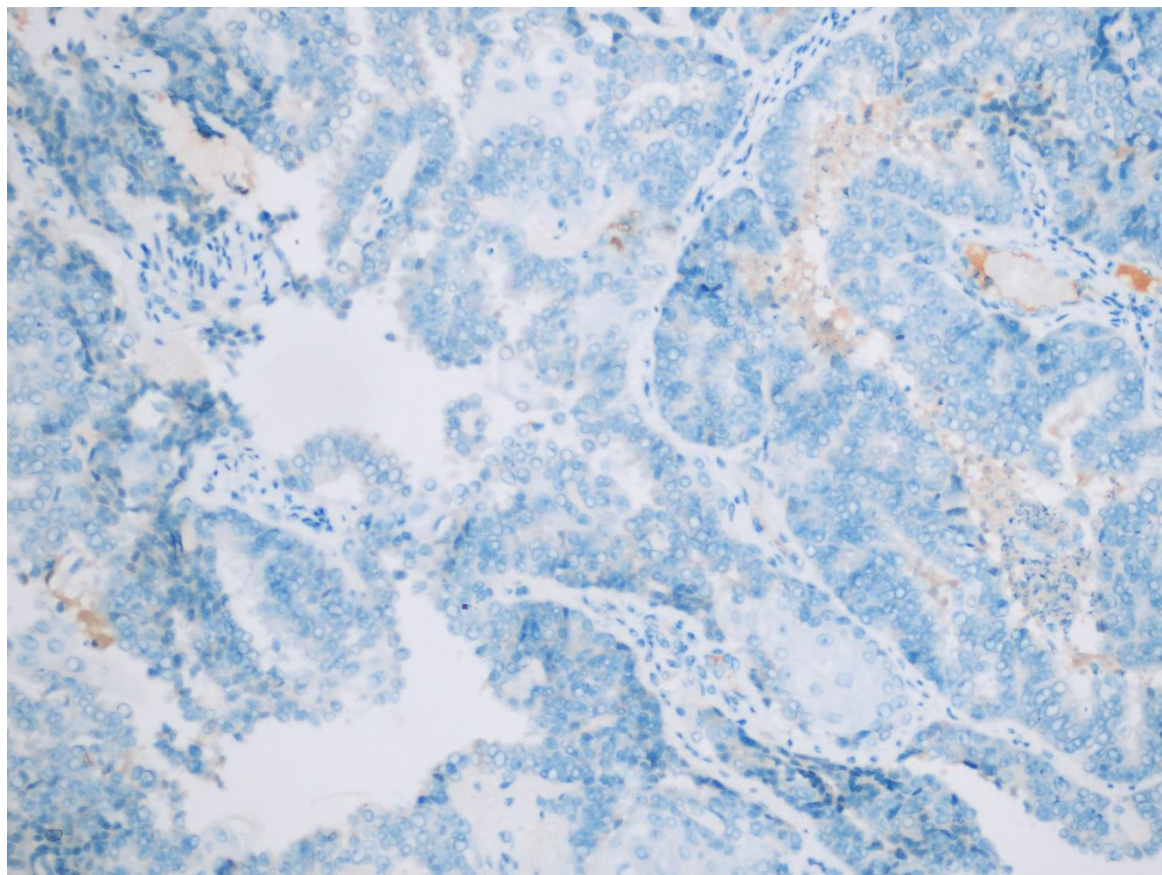**B**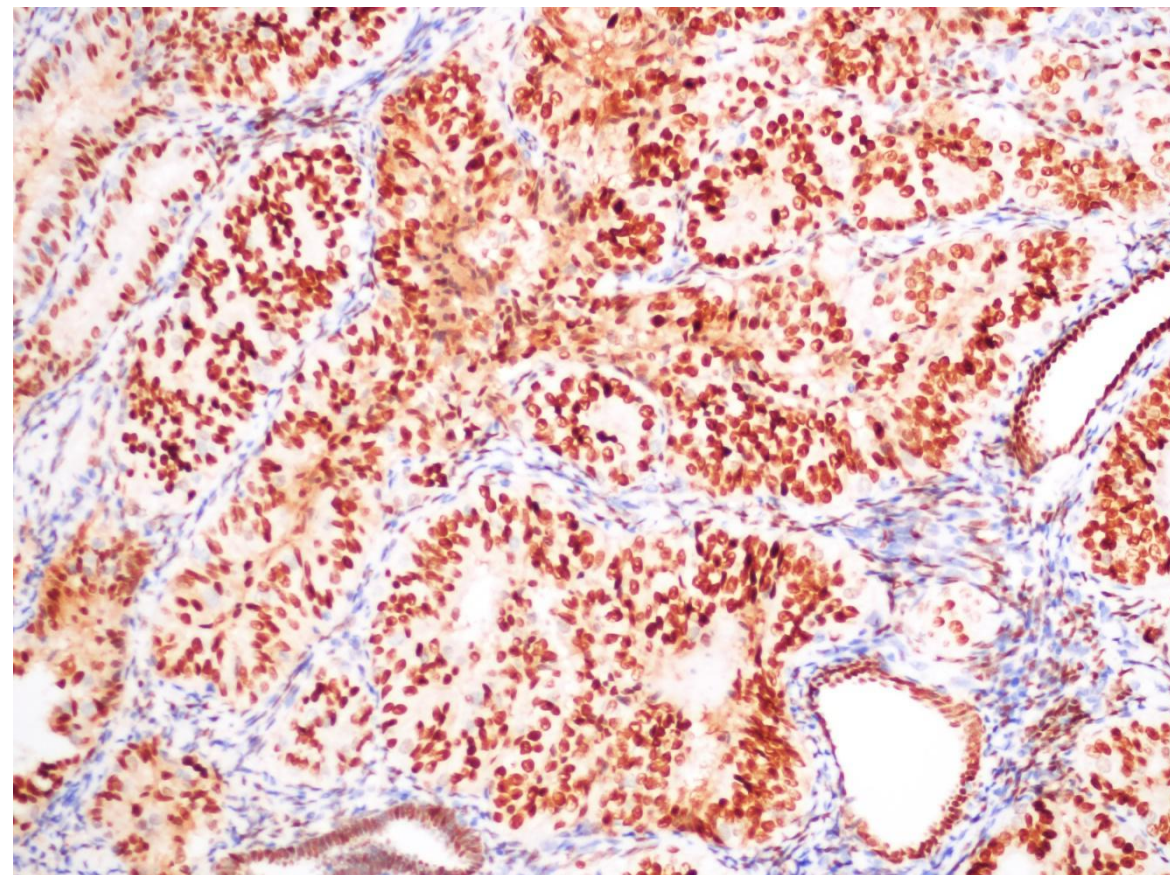

Supplementary Fig.2 Immunohistochemistry (IHC) of PR

Notes: (A) Negative expression of PR; (B) Positive expression of PR. Scale bar: 100  $\mu$ m



**A**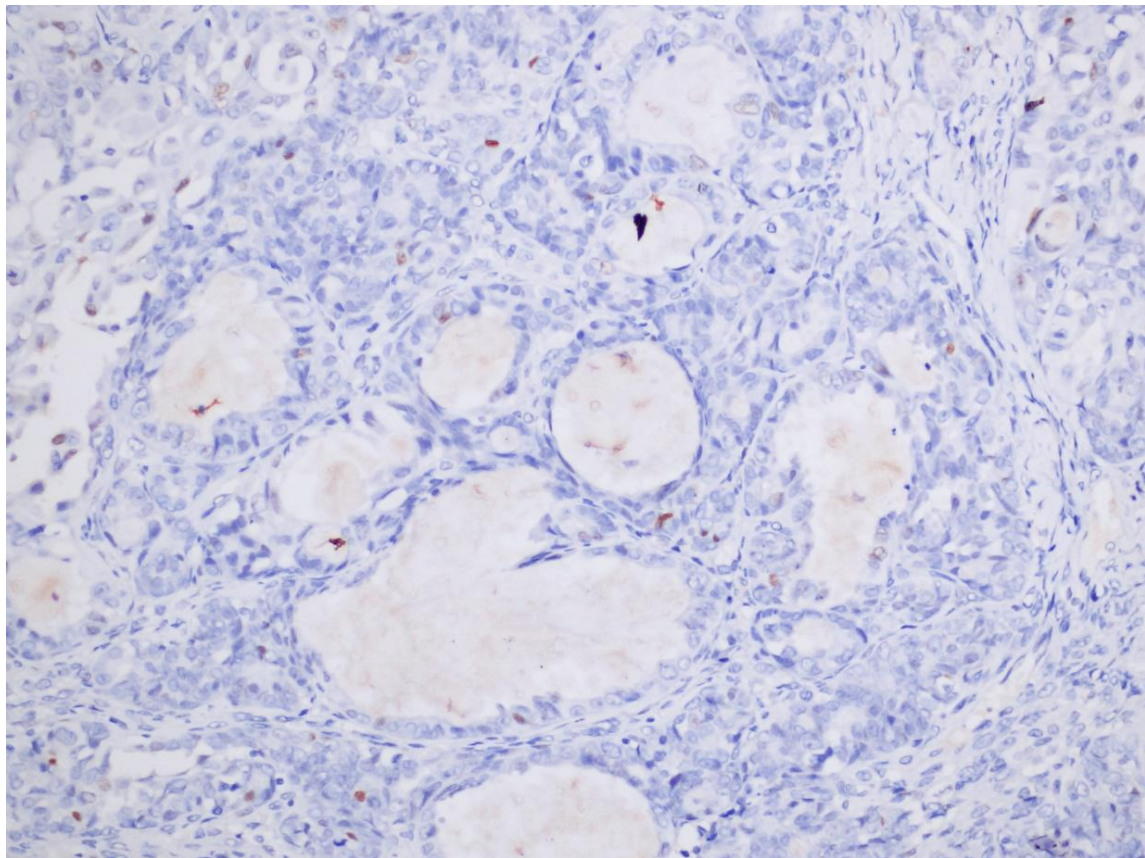**B**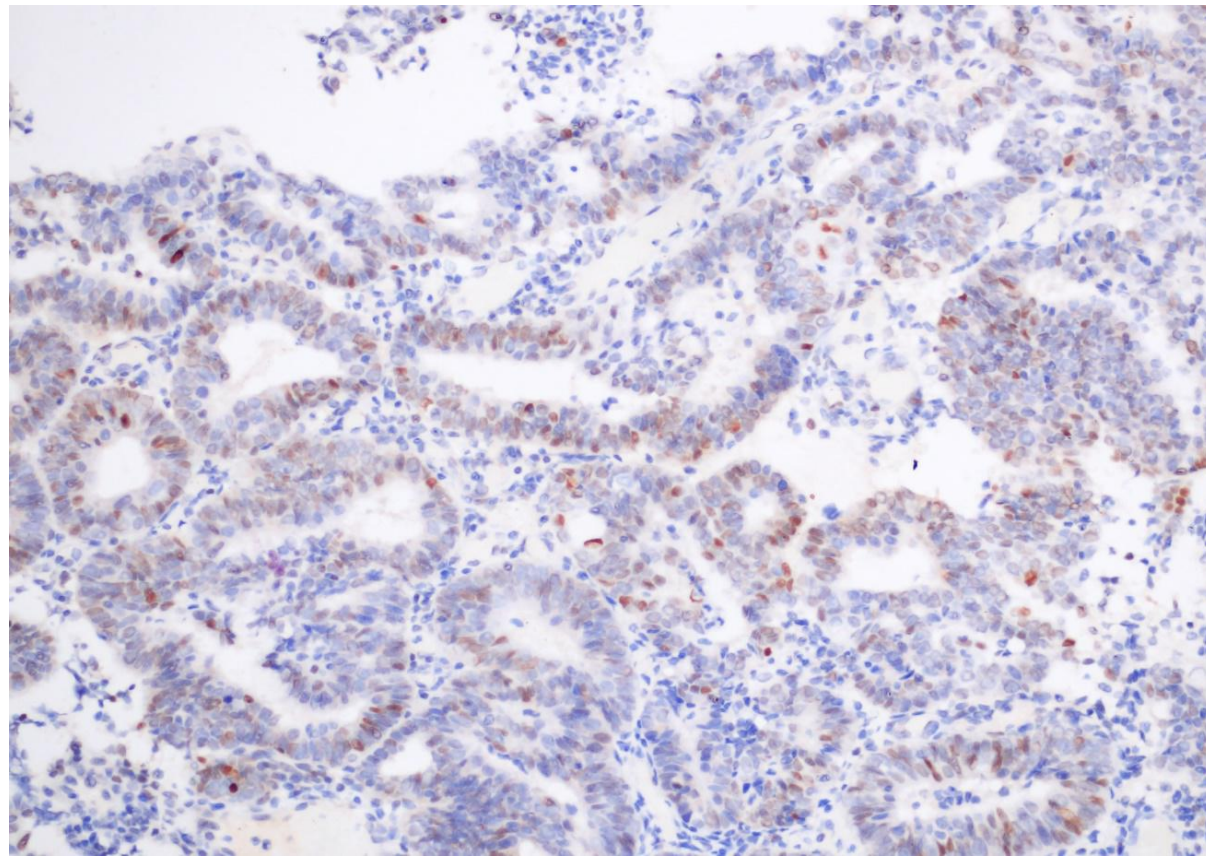

Supplementary Fig.3 Immunohistochemistry (IHC) of P53

Notes: (A) Abnormal expression of P53; (B) Normal expression of P53. Scale bar: 100  $\mu$ m



**A**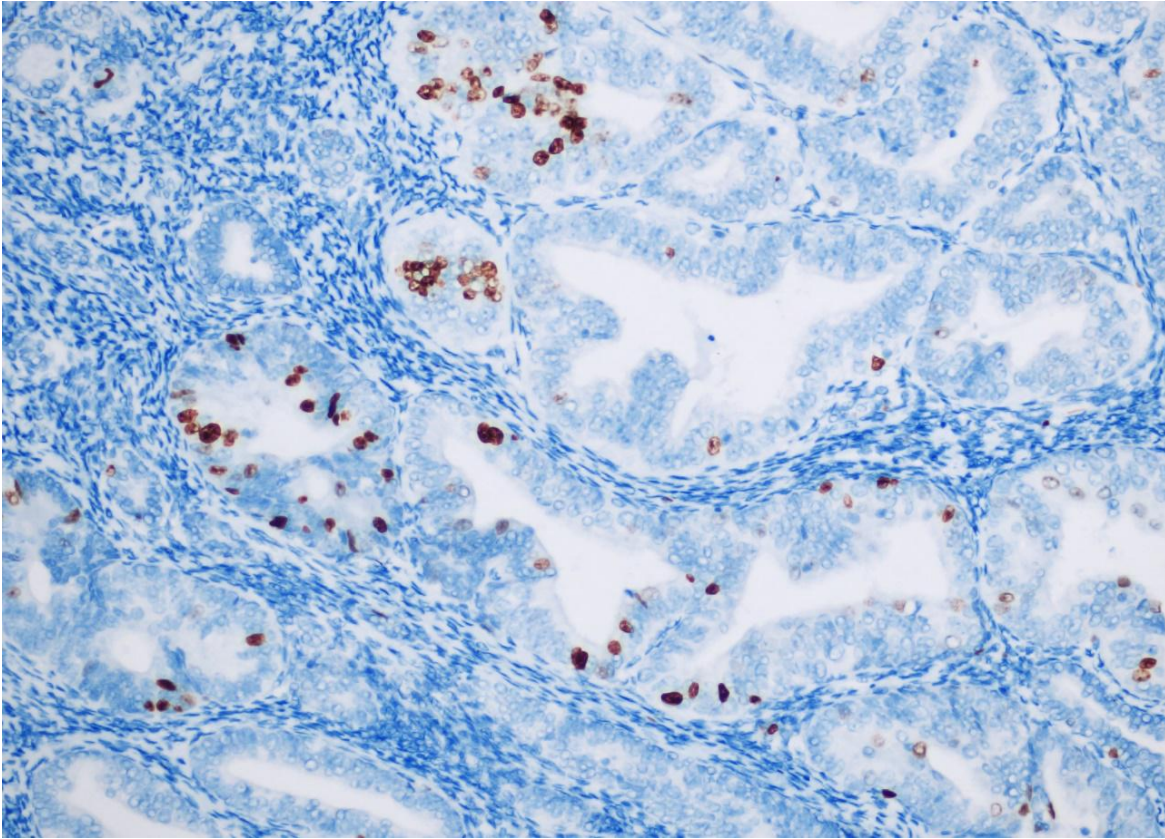**B**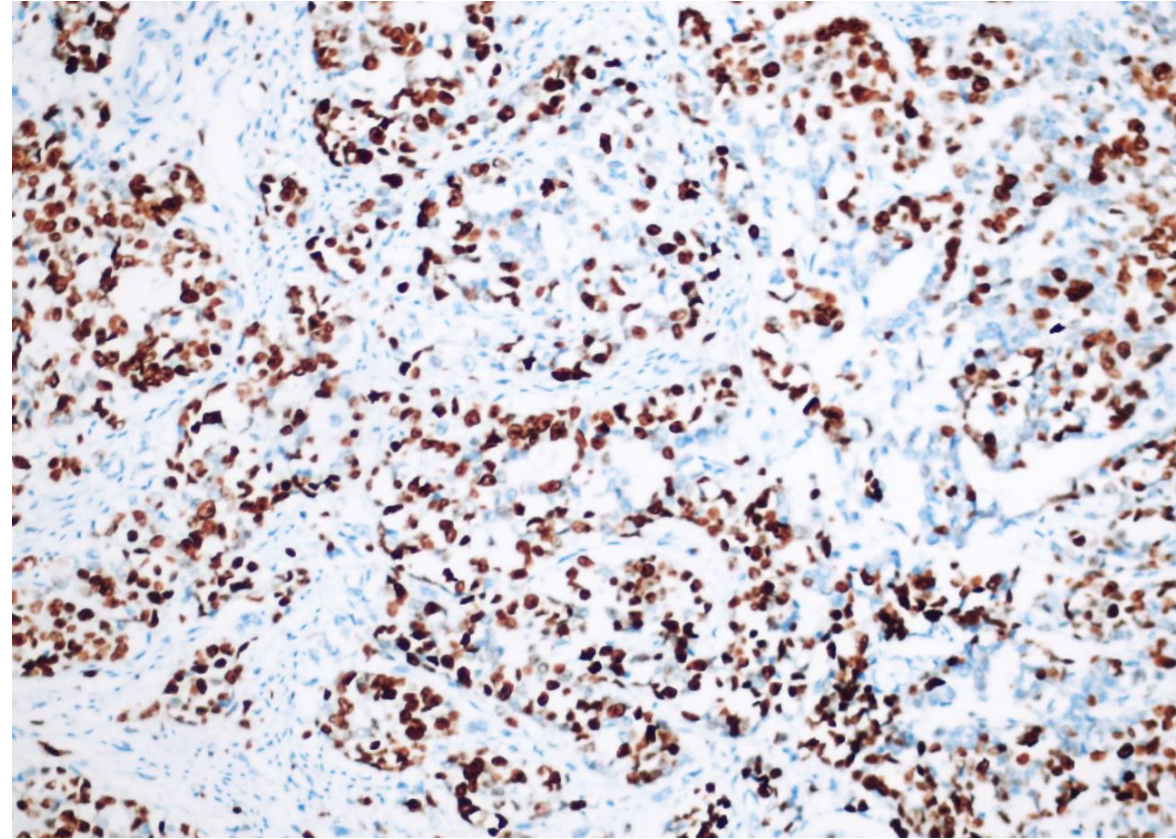

Supplementary Fig.4 Immunohistochemistry (IHC) of Ki67

Notes: (A) Low expression of Ki67; (B) High expression of Ki67. Scale bar: 100  $\mu$ m
